# Supplementary material
Source: PubMed Central journal article supplement (PMC7343593)
Supplement: NIHMS1598860-supplement-1.pdf [file NIHMS1598860-supplement-1.pdf]

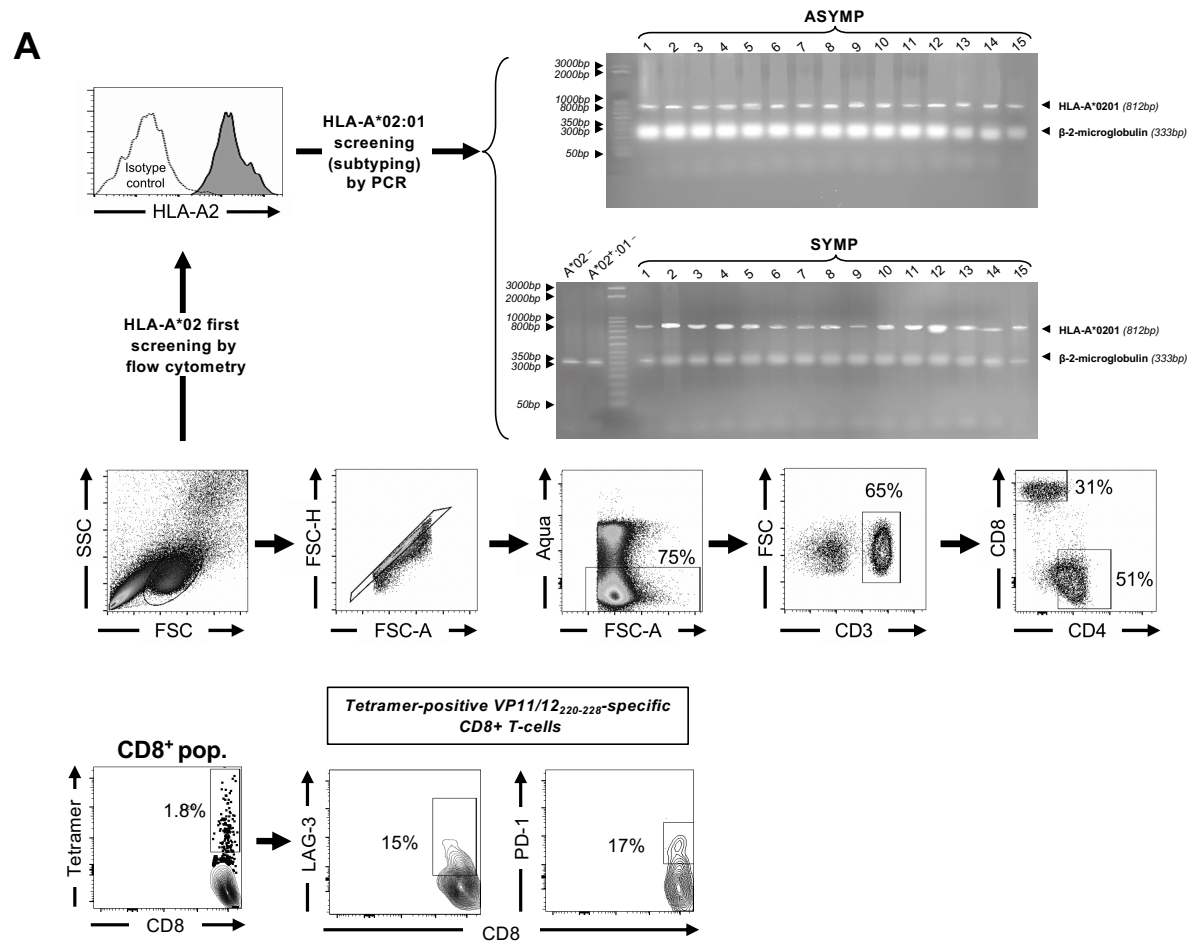

**Figure S1: HLA\*02:01 subtyping and gating strategies applied to human PBMCs-derived HSV-1 VP11/12<sub>220-228</sub>-specific CD8<sup>+</sup> T cells:** (A) HLA typing: HLA-A\*02 patients were first screened by flow cytometry, and subtyping subsequently performed by PCR to include only HLA-A\*02:01 subtyped individual in the study. Gating strategy used for sorting and analysis of HSV-1 VP11/12<sub>220-228</sub>-specific CD8<sup>+</sup> T cells from PBMCs of SYMP vs. ASYMP individuals is shown.

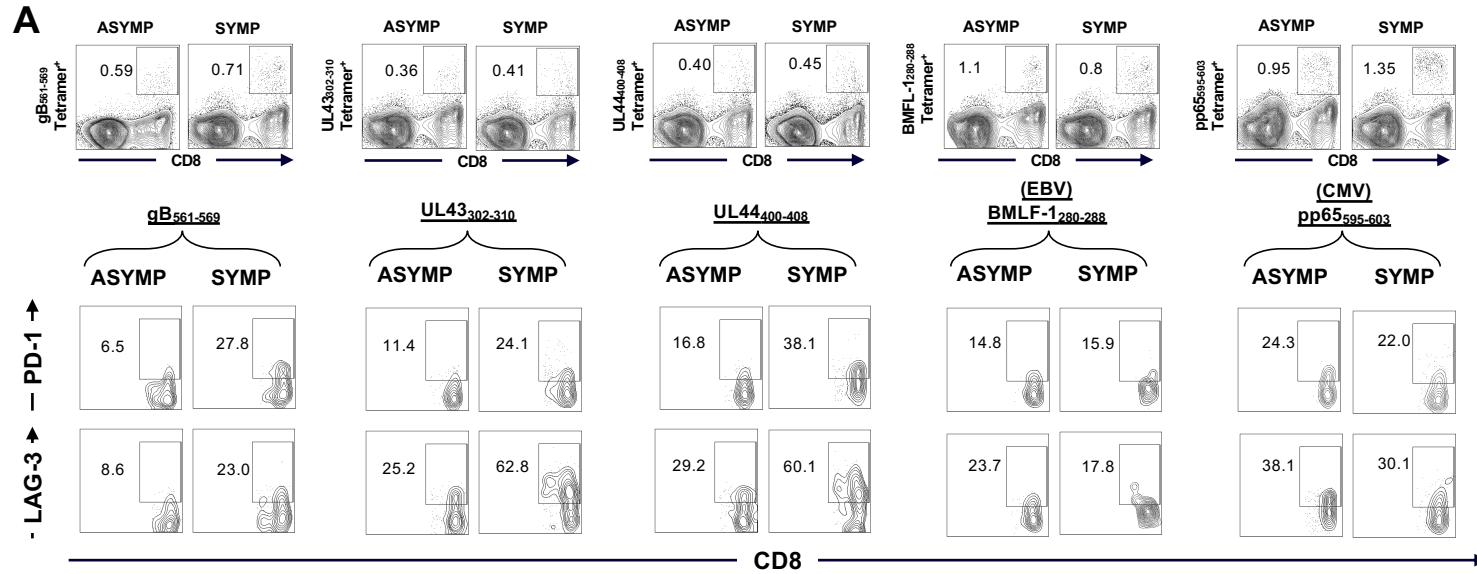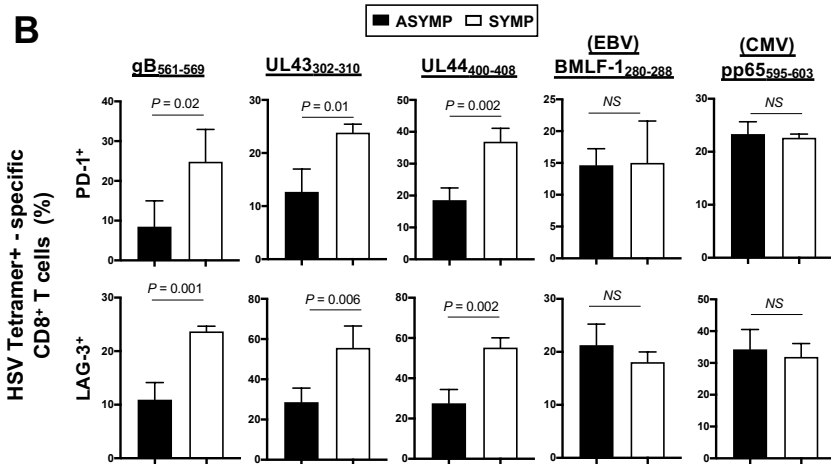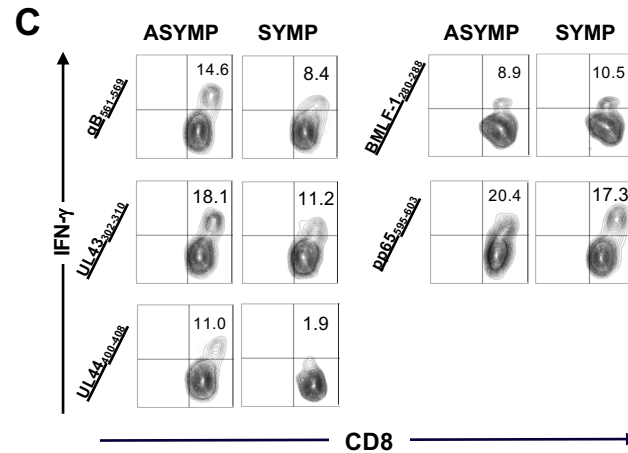

**Figure S2: Cell surface expression of exhaustion receptors by various HSV-specific CD8<sup>+</sup> T cells from symptomatic vs. asymptomatic individuals.**

The experimental design is similar to that in Fig. 2A with a focus on CD8<sup>+</sup> T cells specific to three different epitopes derived from HSV-1 envelope and tegument proteins (gB<sub>561-567</sub>, UL43<sub>302-310</sub> or UL44<sub>400-408</sub>). **(A)** PBMCs from 10 SYMP and 10 ASYMP individuals were stained for CD3/CD8 followed by tetramers specific for either gB<sub>561-567</sub>, UL43<sub>302-310</sub> or UL44<sub>400-408</sub> epitopes and LAG-3/PD-1 exhaustion markers. In parallel, CD8<sup>+</sup> T cells specific to control epitopes were stained for CD3/CD8 followed by tetramers specific for either EBV (BMLF-1<sub>280-288</sub>) or CMV (pp65<sub>595-603</sub>). Representative dot plots represent the exhaustion status of the five epitope-specific CD8<sup>+</sup> T cells from the same ASYMP/SYMP subjects. **(B)** Average frequencies of HSV-1-specific CD8<sup>+</sup> T cells (gB<sub>561-567</sub>, UL43<sub>302-310</sub> or UL44<sub>400-408</sub>) and EBV or CMV-specific CD8<sup>+</sup> T cells expressing PD-1 and LAG-3 receptors, detected from SYMP vs. ASYMP individuals. **(C)** Representative FACS plots of functional HSV-1 gB<sub>561-567</sub><sup>+</sup>, UL43<sub>302-310</sub><sup>+</sup> and UL44<sub>400-408</sub><sup>+</sup>-specific CD8<sup>+</sup> T or EBV- and CMV- specific CD8<sup>+</sup> T cells expressing IFN- $\gamma$  in SYMP vs. ASYMP individuals. Data are expressed as means  $\pm$  the standard deviations (SD). The indicated *P* values were determined using unpaired *t* test.

Coulon *et al.* Fig. S3

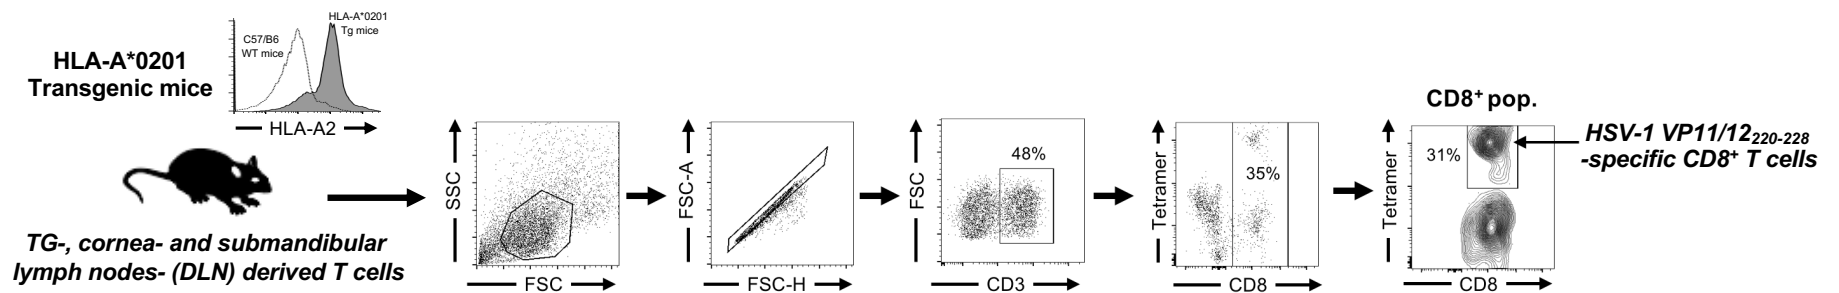

**Figure S3: HLA\*02:01 expression and gating strategies applied to HLA transgenic-derived HSV-1 VP11/12<sub>220-228</sub>-specific CD8<sup>+</sup> T cells:** HLA typing: HLA-A\*02:01 Transgenic mice were screened by flow cytometry to include only mice that express high level of HLA-A2 molecules. Gating strategy used for sorting and analysis of HSV-1 VP11/12<sub>220-228</sub>-specific CD8<sup>+</sup> T cells in DLN of HLA-A\*02:01 Transgenic mice is shown.
